# Supplementary material for: Manganese-rich high entropy oxides for lithium-ion batteries:materials design approaches to address voltage fade
Source: Royal Society of Chemistry journal article supplement (doi:10.1039/d4ta05416d), 2024-01-01
Supplement: d4ta05416d1.pdf [file d4ta05416d1.pdf]

## Supporting information

### Manganese-rich High Entropy Oxides for Lithium-Ion Batteries:

#### Materials Design Approaches to Address Voltage Fade

Cynthia Huang<sup>1,2†</sup>, Jessica Luo<sup>1,3†</sup>, Zachary R. Mansley<sup>4</sup>, Arun Kingan<sup>1,2</sup>, Armando Rodriguez Campos<sup>1,3</sup>, Zhongling Wang<sup>1,2</sup>, Edelm J. Marin Bernardez<sup>1,3</sup>, Alexis Pace<sup>1</sup>, Lu Ma<sup>5</sup>, Steven N. Ehrlich<sup>5</sup>, Lei Wang<sup>1,4</sup>, David C. Bock<sup>1,4</sup>, Esther S. Takeuchi<sup>1,2,3,4</sup>, Amy C. Marschilok<sup>1,2,3,4</sup>, Yimei Zhu<sup>2,6</sup>, Shan Yan<sup>1,4\*</sup>, Kenneth J. Takeuchi<sup>1,2,3,4\*</sup>

1. Institute of Energy: Sustainability, Environment, and Equity, Stony Brook University, Stony Brook, New York, 11794, United States.

2. Department of Materials Science and Chemical Engineering, Stony Brook University, Stony Brook, New York 11794, United States.

3. Department of Chemistry, Stony Brook University, Stony Brook, New York, 11794, United States.

4. Interdisciplinary Science Department, Brookhaven National Laboratory, Upton, NY 11973, United States.

5. National Synchrotron Light Source II, Brookhaven National Laboratory, Upton, NY 11973, United States.

6. Department of Condensed Matter Physics and Materials Science, Brookhaven National Laboratory, Upton, New York 11973, United States.

\*corresponding authors (S.Y.) [syang@bnl.gov](mailto:syang@bnl.gov), (K.J.T.) [kenneth.takeuchi.1@stonybrook.edu](mailto:kenneth.takeuchi.1@stonybrook.edu)

† CH and JL contributed equally to the manuscript

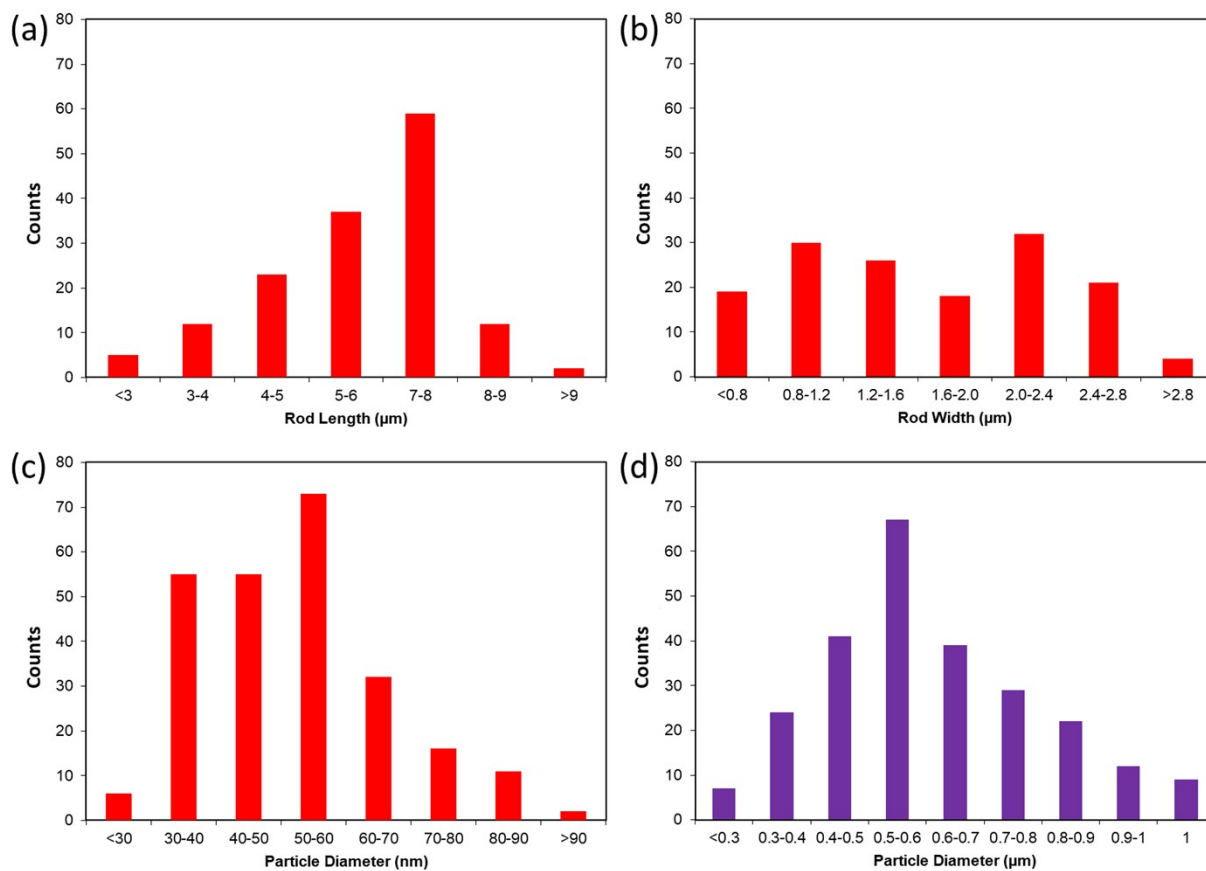

**Figure S1.** Size analysis of HEO-L (a-c) and HEO-H (d).

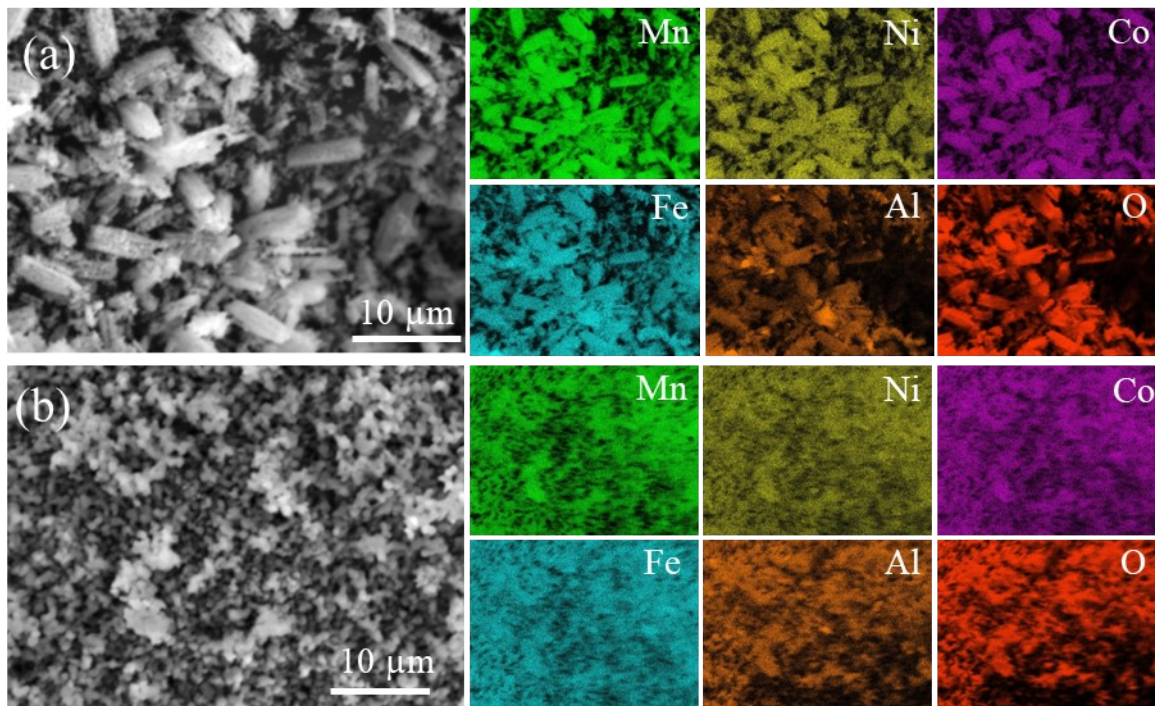

**Figure S2.** EDS images of HEO-L (a) and HEO-H(b).

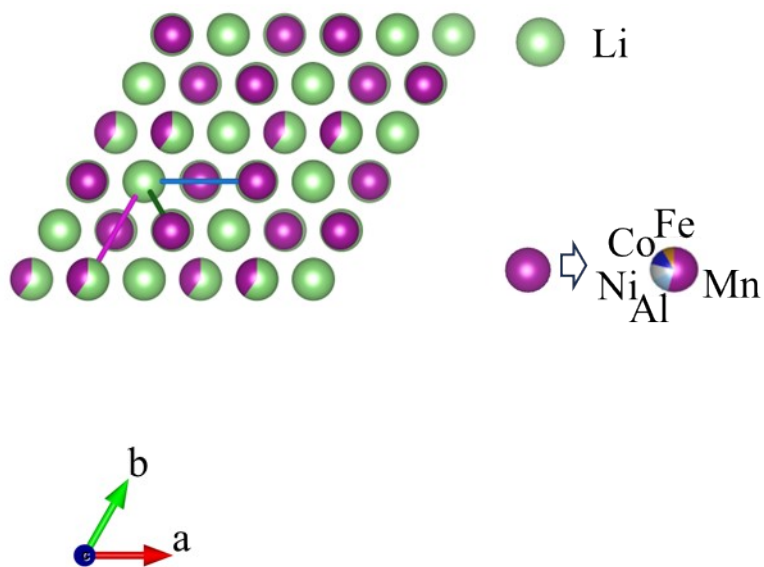

**Figure S3.** Schematic of HEO-L with stack faults with the stacking vectors viewed from the c axis.

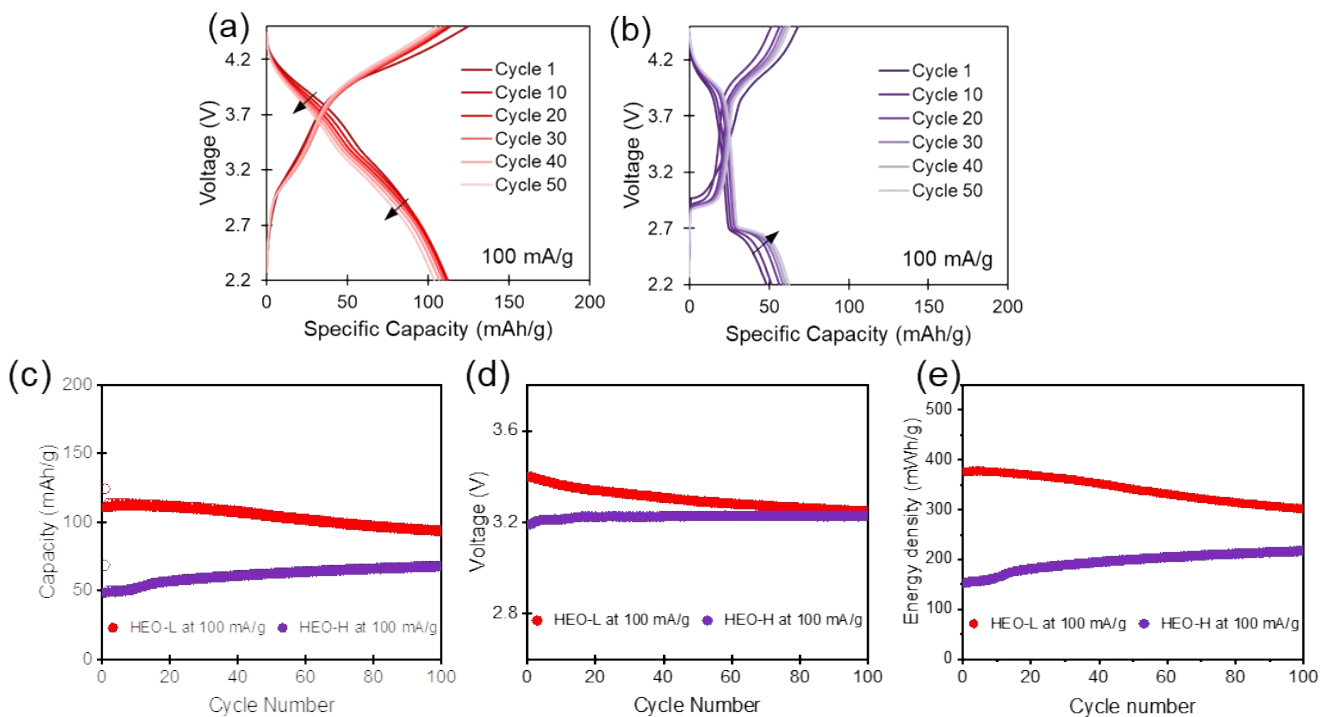

**Figure S4.** Electrochemistry of HEO-L and HEO-H cells at 100 mA/g after 3 formation cycles at 25 mA/g. (a-b) Voltage profiles of HEO-L (a) and HEO-H (b). (c) Extended cycle life of HEO-L and HEO-H, open circle indicates charge and solid cycle indicates discharge. (d) Average voltage of HEO-L and HEO-H. (e) Energy density at discharge of HEO-L and HEO-H.

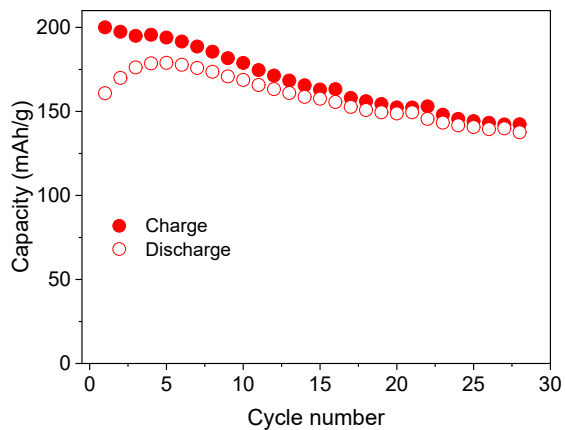

**Figure S5.** Galvanostatic cycling of lithium/ HEO-L cells at 10 mA/g.

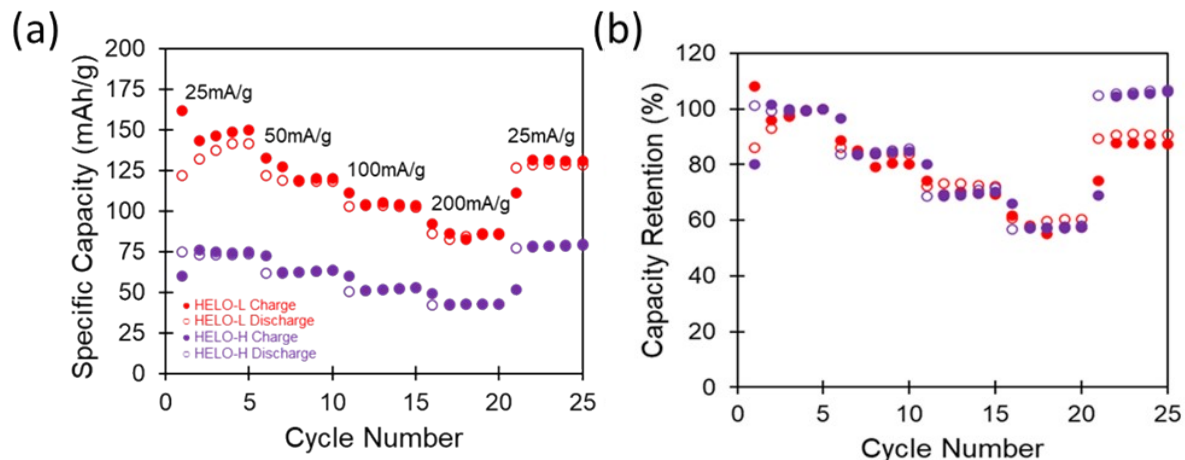

**Figure S6.** Rate capability of HEO-L (red) and HEO-H (purple) at 25, 50, 100, 200, and then back to 25mA/g, normalized by the 5<sup>th</sup> cycle, open circles indicate discharge and solid circles indicate charge.

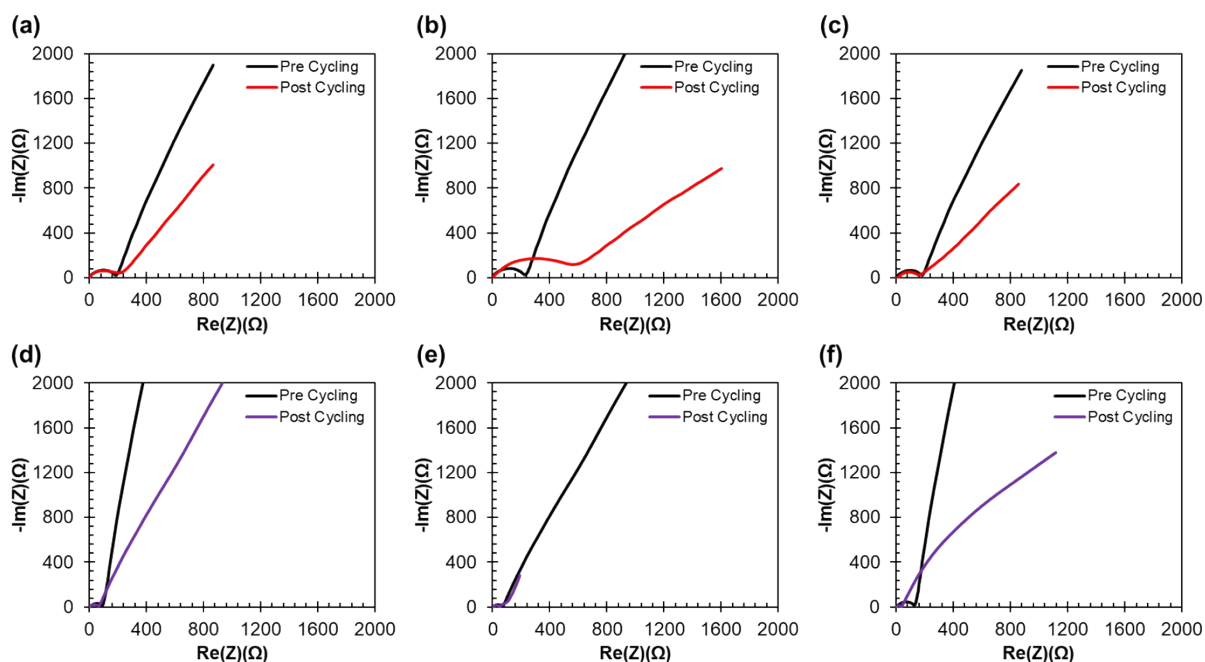

**Figure S7.** Electrochemical impedance spectroscopy recorded for cells before and after rate capability testing and galvanostatic cycling for 100 cycles. Top row: HEO-L before (black) and after (red) cycling under (a) rate capability testing, (b) 25 mA/g and (c) 100 mA/g. Bottom row: HEO-H before (black) and after (purple) cycling under (d) rate capability testing, (e) 25 mA/g and (f) 100 mA/g.

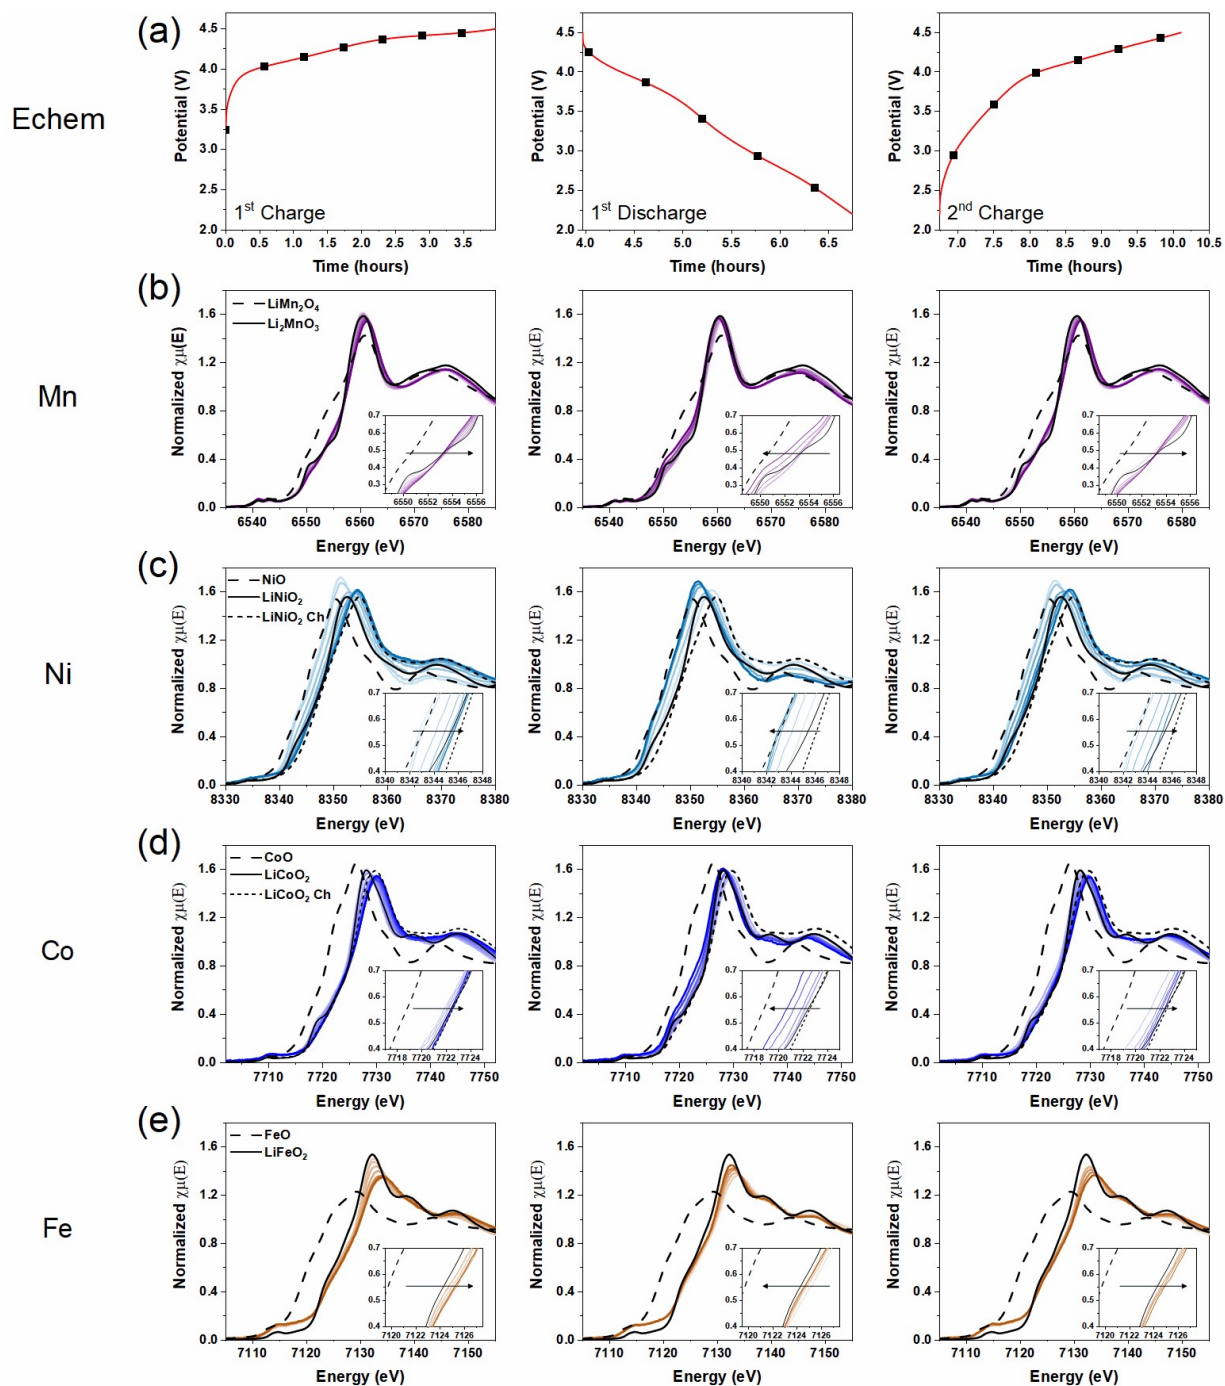

**Figure S8.** Operando XANES spectra of HEO-L electrodes in Li cells. (a) Galvanostatic cycling of HEO-L at current density of 30 mA/g. (b-e) *Operando* XANES spectra collected on Mn, Ni, Co and Fe K-edge of the cells.

**Table S1.** The composition of HEO-L-and HEO-H

| HELO  | ICP-OES |     |     |     |     | XANES/LCF |     |     |     | Composition |                                                                                                                              |
|-------|---------|-----|-----|-----|-----|-----------|-----|-----|-----|-------------|------------------------------------------------------------------------------------------------------------------------------|
|       | Li      | Mn  | Ni  | Co  | Fe  | Al        | Mn  | Ni  | Co  |             | Fe                                                                                                                           |
| HEO-L | 1.5     | 0.6 | 0.1 | 0.1 | 0.1 | 0.1       | 4.0 | 2.4 | 3.0 | 3.0         | Li <sub>1.5</sub> Mn <sub>0.6</sub> Ni <sub>0.1</sub> Co <sub>0.1</sub> Fe <sub>0.1</sub> Al <sub>0.1</sub> O <sub>2.5</sub> |
| HEO-H | 0.5     | 0.6 | 0.1 | 0.1 | 0.1 | 0.1       | 3.8 | 2.4 | 2.7 | 3.0         | Li <sub>0.5</sub> Mn <sub>0.6</sub> Ni <sub>0.1</sub> Co <sub>0.1</sub> Fe <sub>0.1</sub> Al <sub>0.1</sub> O <sub>2.0</sub> |

**Table S2.** Refined structural parameters of HEO-L.

| <b>R-Factor = 1.74 &amp; <math>\chi^2 = 22.91</math></b> |             |              |              |             |                                |             |  |
|----------------------------------------------------------|-------------|--------------|--------------|-------------|--------------------------------|-------------|--|
| <b>Unit cell parameters</b>                              |             |              |              |             |                                |             |  |
| <b>a,b (Å)</b>                                           |             | <b>c (Å)</b> |              |             | <b><math>\gamma</math> (°)</b> |             |  |
| 4.92968 (1)                                              |             | 4.74505 (2)  |              |             | 60.12 (5)                      |             |  |
| <b>Atomic positions and occupancies</b>                  |             |              |              |             |                                |             |  |
| <b>Layer</b>                                             | <b>Atom</b> | <b>x/a</b>   | <b>y/b</b>   | <b>z/c</b>  | <b>Occ.</b>                    | <b>Biso</b> |  |
| 1                                                        | Li          | 0            | 0            | 0           | 1                              | 1           |  |
|                                                          | Li          | 1/3          | 1/3          | 0           | 1                              | 1           |  |
|                                                          | Li          | 2/3          | 2/3          | 0           | 1                              | 1           |  |
| 2, 3, 4                                                  | Li          | 0            | 0            | 0           | 0.6                            | 1           |  |
|                                                          | Mn          | 0            | 0            | 0           | 0.4                            | 1           |  |
|                                                          | Mn          | 0.3292 (5)   | 0.3292 (5)   | 0           | 1                              | 1           |  |
|                                                          | Mn          | 0.6683 (1)   | 0.6683 (1)   | 0           | 1                              | 1           |  |
|                                                          | O           | 0.3368 (17)  | -0.0051 (11) | 0.2329 (5)  | 1                              | 1           |  |
|                                                          | O           | 0.6625 (1)   | 0.0002 (7)   | -0.2300 (1) | 1                              | 1           |  |
|                                                          | O           | 0.0050 (3)   | 0.3368 (1)   | -0.2300 (1) | 1                              | 1           |  |
|                                                          | O           | 0.3423 (11)  | 0.6554 (2)   | -0.2249 (1) | 1                              | 1           |  |
| O                                                        | 0.6552 (1)  | 0.3423 (1)   | 0.2281 (1)   | 1           | 1                              |             |  |
| O                                                        | 0.0034 (7)  | 0.6600 (1)   | 0.2326 (1)   | 1           | 1                              |             |  |

**Table S3.** EXAFS fitting parameters for HEO-L sample measured at the Mn K-edge.  $E_0$ : shift in absorption edge energy. N: coordination number. R: interatomic distance.  $\sigma^2$ : Debye-Waller factor.

| Theoretical FEFF                           | $S_0^2$ | $E_0$ (eV) | Scattering Path | N | R (Å)    | $\sigma^2$ (Å <sup>2</sup> ) | R-factor |
|--------------------------------------------|---------|------------|-----------------|---|----------|------------------------------|----------|
| $\text{Li}_2\text{MnO}_3$ ( <i>C 2/m</i> ) | 0.67(9) | -3(2)      | Mn-O            | 6 | 1.91(1)  | 0.002(2)                     | 0.017    |
|                                            |         |            | Mn-Mn           | 2 | 2.89(1)  | 0.001(3)                     |          |
|                                            |         |            | Mn-Mn           | 1 | 3.14(5)  | 0.001(3)                     |          |
|                                            |         |            | Mn-Li           | 2 | 2.59(15) | 0.001(3)                     |          |
|                                            |         |            | Mn-Li           | 4 | 2.99(1)  | 0.002(2)                     |          |
|                                            |         |            | Mn-Li           | 2 | 3.04(1)  | 0.002(2)                     |          |
|                                            |         |            | Mn-O            | 2 | 3.60(15) | 0.02(3)                      |          |
|                                            |         |            | Mn-O            | 4 | 3.68(15) | 0.02(3)                      |          |

**Table S4.** EXAFS fitting parameters for HEO-L sample measured at the Ni K-edge.  $E_0$ : shift in absorption edge energy. N: coordination number. R: interatomic distance.  $\sigma^2$ : Debye-Waller factor.

| Theoretical FEFF                           | $S_0^2$ | $E_0$ (eV) | Scattering Path | N | R (Å)    | $\sigma^2$ (Å <sup>2</sup> ) | R-factor |
|--------------------------------------------|---------|------------|-----------------|---|----------|------------------------------|----------|
| $\text{Li}_2\text{MnO}_3$ ( <i>C 2/m</i> ) | 0.85    | -1(1)      | Ni-O            | 6 | 2.03(1)  | 0.004(1)                     | 0.014    |
|                                            |         |            | Ni-Mn           | 2 | 2.89(10) | 0.001(1)                     |          |
|                                            |         |            | Ni-Mn           | 1 | 2.84(31) | 0.001(1)                     |          |
|                                            |         |            | Ni-Li           | 2 | 2.61(24) | 0.001(1)                     |          |
|                                            |         |            | Ni-Li           | 4 | 2.99(10) | 0.001(1)                     |          |
|                                            |         |            | Ni-Li           | 2 | 3.04(10) | 0.001(1)                     |          |
|                                            |         |            | Ni-O            | 2 | 3.26(4)  | 0.001(4)                     |          |
|                                            |         |            | Ni-O            | 4 | 3.35(4)  | 0.001(4)                     |          |



**Table S5.** EXAFS fitting parameters for HEO-L sample measured at the Co K-edge.  $E_0$ : shift in absorption edge energy. N: coordination number. R: interatomic distance.  $\sigma^2$ : Debye-Waller factor.

| Theoretical FEFF                                      | $S_0^2$  | $E_0$ (eV) | Scattering Path | N | R (Å)    | $\sigma^2$ (Å <sup>2</sup> ) | R-factor |
|-------------------------------------------------------|----------|------------|-----------------|---|----------|------------------------------|----------|
| $\text{Li}_2\text{MnO}_3$ ( <i>C</i> <sub>2/m</sub> ) | 0.72(10) | -4(2)      | Co-O            | 6 | 1.92(1)  | 0.002(1)                     | 0.019    |
|                                                       |          |            | Co-Mn           | 2 | 2.84(22) | 0.002(1)                     |          |
|                                                       |          |            | Co-Mn           | 1 | 2.84(51) | 0.002(1)                     |          |
|                                                       |          |            | Co-Li           | 2 | 2.59(27) | 0.002(1)                     |          |
|                                                       |          |            | Co-Li           | 4 | 2.95(22) | 0.002(1)                     |          |
|                                                       |          |            | Co-Li           | 2 | 3.00(22) | 0.002(1)                     |          |
|                                                       |          |            | Co-O            | 2 | 3.34(23) | 0.005(1)                     |          |
|                                                       |          |            | Co-O            | 4 | 3.42(24) | 0.005(1)                     |          |

**Table S6.** EXAFS fitting parameters for HEO-L sample measured at the Fe K-edge.  $E_0$ : shift in absorption edge energy. N: coordination number. R: interatomic distance.  $\sigma^2$ : Debye-Waller factor.

| Theoretical FEFF                                      | $S_0^2$ | $E_0$ (eV) | Scattering Path | N | R (Å)   | $\sigma^2$ (Å <sup>2</sup> ) | R-factor |
|-------------------------------------------------------|---------|------------|-----------------|---|---------|------------------------------|----------|
| $\text{Li}_2\text{MnO}_3$ ( <i>C</i> <sub>2/m</sub> ) | 0.90    | -5(2)      | Fe-O            | 6 | 1.98(2) | 0.001(2)                     | 0.020    |
|                                                       |         |            | Fe-Mn           | 2 | 2.90(3) | 0.002(2)                     |          |
|                                                       |         |            | Fe-Mn           | 1 | 3.07(8) | 0.001(2)                     |          |
|                                                       |         |            | Fe-Li           | 2 | 2.81(8) | 0.001(2)                     |          |
|                                                       |         |            | Fe-Li           | 4 | 2.99(8) | 0.001(2)                     |          |
|                                                       |         |            | Fe-Li           | 2 | 3.04(8) | 0.001(2)                     |          |

**Table S7.** Refined structural parameters of HEO-H.

| <b>Rwp = 2.79%</b>                      |                    |              |                   |                            |              |
|-----------------------------------------|--------------------|--------------|-------------------|----------------------------|--------------|
| <b>Layered Phase</b>                    |                    |              |                   |                            |              |
| <b>Unit cell parameters</b>             | <b>a, b (Å)</b>    | <b>c (Å)</b> | <b>Strain (%)</b> | <b>Weight Fraction (%)</b> |              |
|                                         | 2.8867(4)          | 14.2294(11)  | 0.383 (19)        | 0.199 (2)                  |              |
| <b>Atomic positions and occupancies</b> |                    |              |                   |                            |              |
| <b>Atom</b>                             | <b>x/a</b>         | <b>y/b</b>   | <b>z/c</b>        | <b>Occ.</b>                | <b>U iso</b> |
| Li                                      | 0                  | 0            | 0.5               | 1.000                      | 0.0100       |
| O                                       | 0                  | 0            | 0.2775(7)         | 1.000                      | 0.0100       |
| Mn                                      | 0                  | 0            | 0                 | 0.879(7)                   | 0.0229(19)   |
| Co                                      | 0                  | 0            | 0                 | 0.121(7)                   | 0.0229(19)   |
| <b>Spinel Phase</b>                     |                    |              |                   |                            |              |
| <b>Unit cell parameters</b>             | <b>a, b, c (Å)</b> |              | <b>Strain (%)</b> | <b>Weight Fraction (%)</b> |              |
|                                         | 8.1921(2)          |              | 0.720 (7)         | 0.801 (3)                  |              |
| <b>Atomic positions and occupancies</b> |                    |              |                   |                            |              |
| <b>Atom</b>                             | <b>x/a</b>         | <b>y/b</b>   | <b>z/c</b>        | <b>Occ.</b>                | <b>U iso</b> |
| O                                       | 0.2584(2)          | 0.2584(2)    | 0.2584(2)         | 1.000                      | 0.0140(15)   |
| Li                                      | 0.125              | 0.125        | 0.125             | 0.783(4)                   | 0.0227(32)   |
| Co                                      | 0.125              | 0.125        | 0.125             | 0.217(4)                   | 0.0227(32)   |
| Ni                                      | 0.5                | 0.5          | 0.5               | 0.134                      | 0.0110(6)    |
| Mn                                      | 0.5                | 0.5          | 0.5               | 0.600                      | 0.0110(6)    |
| Al                                      | 0.5                | 0.5          | 0.5               | 0.135                      | 0.0110(6)    |
| Fe                                      | 0.5                | 0.5          | 0.5               | 0.131                      | 0.0110(6)    |

**Table S8.** EXAFS fitting parameters for HEO-H sample measured at the Mn K-edge.  $S_0^2$ : amplitude reduction factor.  $E_0$ : shift in absorption edge energy. N: coordination number. R: interatomic distance.  $\sigma^2$ : Debye-Waller factor.

| <b>Theoretical FEFF</b>                 | $S_0^2$ | <b>Phase Fraction</b> | $E_0$ (eV) | <b>Scattering Path</b> | <b>N</b> | <b>R (Å)</b> | $\sigma^2$ (Å <sup>2</sup> ) | <b>R-factor</b> |
|-----------------------------------------|---------|-----------------------|------------|------------------------|----------|--------------|------------------------------|-----------------|
| Layered $R\bar{3}m$                     | 0.61(6) | 0.15                  | 0(1)       | Mn-O                   | 6        | 1.93(1)      | 0.003(1)                     | 0.019           |
|                                         |         |                       |            | Mn-Mn                  | 6        | 2.89(1)      | 0.005(1)                     |                 |
|                                         |         |                       |            | Mn-Li                  | 6        | 2.90(1)      | 0.005(1)                     |                 |
| Spinel $Fd\bar{3}m$<br>Wyckoff site 16d | 0.61(6) | 0.85                  | 0(1)       | Mn-O                   | 6        | 1.90(1)      | 0.001(3)                     |                 |
|                                         |         |                       |            | Mn-Mn                  | 6        | 2.90(1)      | 0.002(2)                     |                 |
|                                         |         |                       |            | Mn-O                   | 6        | 3.61(4)      | 0.02(3)                      |                 |

**Table S9.** EXAFS fitting parameters for HEO-H sample measured at the Ni K-edge.  $E_0$ : shift in absorption edge energy. N: coordination number. R: interatomic distance.  $\sigma^2$ : Debye-Waller factor.

| Theoretical FEFF                         | $S_0^2$ | $E_0$ (eV) | Scattering Path | N | R (Å)   | $\sigma^2$ (Å <sup>2</sup> ) | R-factor |
|------------------------------------------|---------|------------|-----------------|---|---------|------------------------------|----------|
| Spinel ( <i>Fd3m</i> ), Wyckoff site 16d | 0.80    | -1(1)      | Ni-O            | 6 | 2.03(1) | 0.007(2)                     | 0.011    |
|                                          |         |            | Ni-Mn           | 6 | 2.91(1) | 0.007(2)                     |          |
|                                          |         |            | Ni-Mn           | 3 | 3.42(1) | 0.007(2)                     |          |
|                                          |         |            | Ni-Li           | 3 | 3.42(1) | 0.007(2)                     |          |
|                                          |         |            | Ni-O            | 6 | 3.47(7) | 0.007(2)                     |          |

**Table S10.** EXAFS fitting parameters for HEO-H sample measured at the Co K-edge.  $E_0$ : shift in absorption edge energy. N: coordination number. R: interatomic distance.  $\sigma^2$ : Debye-Waller factor.

| Theoretical FEFF                        | $S_0^2$ | Phase Fraction | $E_0$ (eV) | Scattering Path | N  | R (Å)    | $\sigma^2$ (Å <sup>2</sup> ) | R-factor |
|-----------------------------------------|---------|----------------|------------|-----------------|----|----------|------------------------------|----------|
| Layered ( <i>R-3m</i> )                 | 0.61(6) | 0.71(6)        | 1(1)       | Co-O            | 6  | 1.93(1)  | 0.002(1)                     | 0.021    |
|                                         |         |                |            | Co-Mn           | 6  | 2.87(1)  | 0.005(1)                     |          |
|                                         |         |                |            | Co-Li           | 6  | 2.87(1)  | 0.005(1)                     |          |
|                                         |         |                |            | Co-O            | 6  | 3.49(1)  | 0.005(1)                     |          |
|                                         |         |                |            | Co-O            | 6  | 4.201(2) | 0.005(1)                     |          |
| Spinel ( <i>Fd3m</i> ), Wyckoff site 8a | 0.61(6) | 0.29(6)        | 1(1)       | Co-O            | 4  | 1.87(1)  | 0.002(1)                     |          |
|                                         |         |                |            | Co-Mn           | 12 | 3.38(1)  | 0.005(1)                     |          |
|                                         |         |                |            | Co-O            | 12 | 3.41(1)  | 0.005(1)                     |          |

**Table S11.** EXAFS fitting parameters for HEO-H sample measured at the Fe K-edge.  $E_0$ : shift in absorption edge energy. N: coordination number. R: interatomic distance.  $\sigma^2$ : Debye-Waller factor.

| Theoretical FEFF                         | $S_0^2$  | $E_0$ (eV) | Scattering Path | N | R (Å)   | $\sigma^2$ (Å <sup>2</sup> ) | R-factor |
|------------------------------------------|----------|------------|-----------------|---|---------|------------------------------|----------|
| Spinel ( <i>Fd3m</i> ), Wyckoff site 16d | 0.81(12) | -7(1)      | Fe-O            | 6 | 1.97(1) | 0.007(2)                     | 0.017    |
|                                          |          |            | Fe-Mn           | 6 | 2.94(1) | 0.007(2)                     |          |
|                                          |          |            | Fe-Mn           | 3 | 3.54(3) | 0.007(2)                     |          |
|                                          |          |            | Fe-Li           | 3 | 3.54(3) | 0.007(2)                     |          |
|                                          |          |            | Fe-O            | 6 | 3.77    | 0.007(2)                     |          |

**Table S12.** Irreversible capacity values for cycles 1 and 2.

|                                 | HEO-L            |                  | HEO-H            |                  |
|---------------------------------|------------------|------------------|------------------|------------------|
|                                 | Cycle 1<br>mAh/g | Cycle 2<br>mAh/g | Cycle 1<br>mAh/g | Cycle 2<br>mAh/g |
| Charge Capacity (mAh/g)         | 146.2            | 133.6            | 41.8             | 80.8             |
| Discharge Capacity (mAh/g)      | 111.9            | 121.5            | 78.1             | 76.4             |
| Irreversible capacity C minus D | 34.3             | 12.1             | -36.3            | 4.4              |
| Irreversible capacity %         | 23%              | 9%               | N/A              | 5.4%             |

**Table S13.** Comparisons of the delivered capacities under charge and discharge for related materials from the literature to this work.

| Material,<br>Synthesis                                                                                                                                                                      | Structure                  | Current<br>Density        | 1 <sup>st</sup> Charge<br>Capacity at<br>< 4.45 V<br>(mAh/g) | Voltage<br>Range (V) | 1 <sup>st</sup> Cycle<br>Charge<br>Capacity<br>(mAh/g) | 1 <sup>st</sup> Cycle<br>Discharge<br>Capacity<br>(mAh/g) | Ref                  |
|---------------------------------------------------------------------------------------------------------------------------------------------------------------------------------------------|----------------------------|---------------------------|--------------------------------------------------------------|----------------------|--------------------------------------------------------|-----------------------------------------------------------|----------------------|
| <b>HEO-L</b>                                                                                                                                                                                | <b>Layered</b>             | <b>10 mA/g</b>            | <b>177</b>                                                   | <b>2.2 – 4.5</b>     | <b>200</b>                                             | <b>161</b>                                                | <b>This<br/>work</b> |
| Li[Li <sub>0.2</sub> Ni <sub>0.1</sub> Co <sub>0.2</sub> Mn <sub>0.5</sub> ]O <sub>2</sub><br>Sol-gel, annealed at 950°C in<br>air                                                          | Layered                    | 0.4<br>mA/cm <sup>2</sup> | ~140                                                         | 2.5 – 4.5            | ~260                                                   | 190                                                       | <sup>1</sup>         |
| Li[Li <sub>0.2</sub> Ni <sub>0.166</sub> Co <sub>0.067</sub> Mn <sub>0.567</sub> ]O <sub>2</sub><br>Solid state, annealed between<br>500-1000°C in air                                      | Layered                    | 20 mA/g                   | 108                                                          | 2.0 – 4.6            | 302                                                    | 224                                                       | <sup>2</sup>         |
| Li <sub>1.2</sub> Ni <sub>0.16</sub> Mn <sub>0.51</sub> Al <sub>0.05</sub> Co <sub>0.08</sub> O <sub>2</sub><br>Self-combustion, annealed<br>between 450-900°C in air                       | Layered                    | 25 mA/g                   | ~120                                                         | 2.0 – 4.6            | 320                                                    | 215                                                       | <sup>3</sup>         |
| Li[Li <sub>0.1</sub> Ni <sub>0.2</sub> Co <sub>0.1</sub> Mn <sub>0.6</sub> ]O <sub>2</sub><br>Sol-gel, annealed at 950°C in<br>air                                                          | Layered                    | 0.1<br>mA/cm <sup>2</sup> | ~170                                                         | 2.5 – 4.6            | ~275                                                   | ~215                                                      | <sup>4</sup>         |
| Li <sub>1.2</sub> Ni <sub>0.15</sub> Mn <sub>0.55</sub> Co <sub>0.1</sub> O <sub>2</sub><br>Commercial source                                                                               | Layered                    | 10 mA/g                   | ~125                                                         | 2.0 – 4.7            | 327                                                    | 283                                                       | <sup>5</sup>         |
| Li[Li <sub>0.2</sub> Ni <sub>0.2</sub> Mn <sub>0.6</sub> ]O <sub>2</sub><br>Coprecipitation, annealed at<br>900°C                                                                           | Layered                    | 10 mA/g                   | ~110                                                         | 2.0 – 4.7            | 330                                                    | 281                                                       | <sup>6</sup>         |
|                                                                                                                                                                                             |                            |                           |                                                              |                      |                                                        |                                                           |                      |
| <b>HEO-H</b>                                                                                                                                                                                | <b>Layered<br/>-Spinel</b> | <b>25 mA/g</b>            | <b>39</b>                                                    | <b>2.2 – 4.5</b>     | <b>42</b>                                              | <b>78</b>                                                 | <b>This<br/>work</b> |
| Li <sub>1.2</sub> Ni <sub>0.13</sub> Co <sub>0.13</sub> Mn <sub>0.54</sub> O <sub>2</sub> -<br>LiNi <sub>0.5</sub> Mn <sub>0.5</sub> O <sub>4</sub><br>Sol-gel, annealed at 750°C in<br>air | Layered-<br>Spinel         | 60 mA/g                   | ~45-150                                                      | 2.0 – 4.8            | ~250-<br>325                                           | ~225-260                                                  | <sup>7</sup>         |
| Li <sub>1.1</sub> [Mn <sub>0.6</sub> Co <sub>0.8</sub> Ni <sub>0.6</sub> ]O <sub>4-σ</sub><br>Hydrothermal, annealed at<br>500-600°C                                                        | Layered-<br>Spinel         | ~27<br>mA/g               | ~80-90                                                       | 2.0 – 4.9            | ~240-<br>349                                           | ~140-149                                                  | <sup>8</sup>         |
| Li <sub>1.17</sub> Ni <sub>0.25</sub> Mn <sub>1.08</sub> O <sub>3</sub><br>Self-combustion, annealed at                                                                                     | Layered-<br>Spinel         | 20 mA/g                   | ~35                                                          | 2.4 – 4.9            | 130                                                    | 140                                                       | <sup>9</sup>         |

|                                                                                                                                                                                                          |                |                        |      |            |       |      |               |
|----------------------------------------------------------------------------------------------------------------------------------------------------------------------------------------------------------|----------------|------------------------|------|------------|-------|------|---------------|
| 900°C in air                                                                                                                                                                                             |                |                        |      |            |       |      |               |
| 0.75Li[Mn <sub>1.5</sub> Ni <sub>0.5</sub> ]O <sub>4</sub> · 0.25{Li <sub>2</sub> MnO <sub>3</sub> · Li(Mn <sub>0.5</sub> Ni <sub>0.5</sub> )O <sub>2</sub><br>Coprecipitation, annealed at 900°C in air | Layered-Spinel | 0.1 mA/cm <sup>2</sup> | ~40  | 2.0 – 4.95 | ~150  | ~200 | <sup>10</sup> |
| LiMn <sub>1.9</sub> Al <sub>0.1</sub> O <sub>4</sub><br>Combustion, annealed at 850°C                                                                                                                    | Spinel         | ~70 mA/g               | -    | 3.2 – 4.2  | 100.7 | 89.5 | <sup>11</sup> |
| LiMn <sub>2</sub> O <sub>4</sub> doped with Cu/Al/Ti<br>Sol-gel, annealed at 800°C                                                                                                                       | Spinel         | ~15 mA/g               | -    | 3.5 – 4.3  | -     | 134  | <sup>12</sup> |
| LiMn <sub>2</sub> O <sub>4</sub><br>Solid state, annealed at 800°C                                                                                                                                       | Spinel         | ~20 mA/g               | ~125 | 3.4 – 4.5  | ~130  | 125  | <sup>13</sup> |
| LiNi <sub>0.5</sub> Mn <sub>1.5</sub> O <sub>4</sub><br>Solid state, annealed between 500-900°C in air                                                                                                   | Spinel         | ~15 mA/g               | ~25  | 3.5 – 4.9  | 140   | 120  | <sup>14</sup> |

## References

1. K. S. Park, M. H. Cho, S. J. Jin and K. S. Nahm, *Electrochem Solid St*, 2004, **7**, A239-A241.
2. H. J. Yu, H. J. Kim, Y. R. Wang, P. He, D. Asakura, Y. Nakamura and H. S. Zhou, *Phys Chem Chem Phys*, 2012, **14**, 6584-6595.
3. P. K. Nayak, J. Grinblat, M. Levi, E. Levi, S. Kim, J. W. Choi and D. Aurbach, *Advanced Energy Materials*, 2016, **6**.
4. J. H. Kim, C. W. Park and Y. K. Sun, *Solid State Ionics*, 2003, **164**, 43-49.
5. M. Bettge, Y. Li, K. Gallagher, Y. Zhu, Q. Wu, W. Lu, I. Bloom and D. P. Abraham, *Journal of The Electrochemical Society*, 2013, **160**, A2046-A2055.
6. J. M. Zheng, W. Shi, M. Gu, J. Xiao, P. J. Zuo, C. M. Wang and J. G. Zhang, *Journal of the Electrochemical Society*, 2013, **160**, A2212-A2219.
7. X. Feng, Z. Z. Yang, D. C. Tang, Q. Y. Kong, L. Gu, Z. X. Wang and L. Q. Chen, *Phys Chem Chem Phys*, 2015, **17**, 1257-1264.
8. L. H. Hu, L. Yin, F. Hassan and J. Cabana, *J Solid State Chem*, 2020, **288**.
9. P. K. Nayak, J. Grinblat, M. Levi, O. Haik, E. Levi, Y. K. Sun, N. Munichandraiah and D. Aurbach, *Journal of Materials Chemistry A*, 2015, **3**, 14598-14608.
10. S. H. Park, S. H. Kang, C. S. Johnson, K. Amine and M. M. Thackeray, *Electrochem Commun*, 2007, **9**, 262-268.
11. Z. F. Cai, Y. Z. Ma, X. N. Huang, X. H. Yan, Z. X. Yu, S. H. Zhang, G. S. Song, Y. L. Xu, C. E. Wen and W. D. Yang, *J Energy Storage*, 2020, **27**.
12. L. L. Xiong, Y. L. Xu, T. Tao and J. B. Goodenough, *J Power Sources*, 2012, **199**, 214-219.
13. J. Cho and M. M. Thackeray, *Journal of the Electrochemical Society*, 1999, **146**, 3577-3581.

14. J. H. Kim, N. P. W. Pieczonka, Z. C. Li, Y. Wu, S. Harris and B. R. Powell, *Electrochim Acta*, 2013, **90**, 556-562.
